# Supplementary material for: D-galactose-induced brain ageing model: A systematic review and meta-analysis on cognitive outcomes and oxidative stress indices
Source: PubMed Central journal article supplement (PMC5576729; doi:10.1371/journal.pone.0184122), 2017-08-30
Supplement: pone.0184122.s002.pdf [file pone.0184122.s002.pdf]

| Study | ES     | [95% Conf. Interval] |         | % Weight |
|-------|--------|----------------------|---------|----------|
| 1     | -2.303 | -1.119               | -3.488  | 0.5      |
| 2     | 4.747  | 7.325                | 2.168   | 0.35     |
| 3     | 1.144  | 2.105                | 0.182   | 0.52     |
| 4     | 5.199  | 7.493                | 2.904   | 0.38     |
| 5     | 4.343  | 6.334                | 2.352   | 0.41     |
| 6     | 4.231  | 5.936                | 2.525   | 0.44     |
| 7     | 1.221  | 2.315                | 0.126   | 0.51     |
| 8     | 3.338  | 4.991                | 1.684   | 0.45     |
| 9     | 1.258  | 2.236                | 0.279   | 0.52     |
| 10    | 8.323  | 11.332               | 5.314   | 0.3      |
| 11    | 2.814  | 4.123                | 1.504   | 0.49     |
| 12    | 5.853  | 7.833                | 3.873   | 0.41     |
| 13    | 1.458  | 2.276                | 0.64    | 0.53     |
| 14    | 2.705  | 3.863                | 1.547   | 0.5      |
| 15    | 5.861  | 11.742               | -0.02   | 0.13     |
| 16    | 2.538  | 3.947                | 1.129   | 0.48     |
| 17    | 15.29  | 20.65                | 9.93    | 0.15     |
| 18    | 2.687  | 4.14                 | 1.234   | 0.47     |
| 19    | 3.036  | 6.376                | -0.304  | 0.27     |
| 20    | 42.327 | 56.991               | 27.663  | 0.03     |
| 21    | 1.961  | 4.441                | -0.518  | 0.36     |
| 22    | 1.46   | 2.471                | 0.448   | 0.51     |
| 23    | 20.053 | 27.044               | 13.063  | 0.1      |
| 24    | 0.421  | 1.683                | -0.841  | 0.49     |
| 25    | 2.239  | 3.566                | 0.913   | 0.48     |
| 26    | -7.399 | -4.512               | -10.285 | 0.32     |
| 27    | 4.296  | 6.68                 | 1.913   | 0.37     |
| 28    | 3.238  | 6.751                | -0.274  | 0.26     |
| 29    | 1.385  | 2.194                | 0.577   | 0.53     |
| 30    | 1.271  | 2.066                | 0.477   | 0.53     |
| 31    | 5.089  | 8.853                | 1.324   | 0.24     |
| 32    | 7.357  | 10.048               | 4.666   | 0.34     |
| 33    | 2.326  | 3.929                | 0.723   | 0.45     |
| 34    | 6.734  | 9.594                | 3.873   | 0.32     |
| 35    | 11.648 | 23.009               | 0.287   | 0.04     |
| 36    | 6.97   | 9.535                | 4.405   | 0.35     |
| 37    | 2.948  | 6.214                | -0.318  | 0.28     |
| 38    | 58.503 | 91.462               | 25.543  | 0.01     |
| 39    | 8.965  | 12.674               | 5.255   | 0.25     |
| 40    | 2.498  | 3.61                 | 1.385   | 0.51     |
| 41    | 1.242  | 2.246                | 0.238   | 0.52     |
| 42    | 1.152  | 2.028                | 0.276   | 0.53     |
| 43    | 2.284  | 3.622                | 0.946   | 0.48     |
| 44    | 1.589  | 2.961                | 0.217   | 0.48     |
| 45    | 5.175  | 7.168                | 3.182   | 0.41     |
| 46    | 31.965 | 43.054               | 20.876  | 0.04     |
| 47    | 2.889  | 4.218                | 1.56    | 0.48     |
| 48    | 13.057 | 17.657               | 8.457   | 0.19     |

|    |        |         |        |      |
|----|--------|---------|--------|------|
| 49 | 4.449  | 6.22    | 2.678  | 0.44 |
| 50 | 11.551 | 15.641  | 7.462  | 0.22 |
| 51 | 4.259  | 6.958   | 1.56   | 0.33 |
| 52 | 0.379  | 1.371   | -0.612 | 0.52 |
| 53 | 1.688  | 2.741   | 0.635  | 0.51 |
| 54 | 2.341  | 3.695   | 0.987  | 0.48 |
| 55 | 2.26   | 3.592   | 0.928  | 0.48 |
| 56 | 3.55   | 5.62    | 1.48   | 0.4  |
| 57 | 4.884  | 6.787   | 2.981  | 0.42 |
| 58 | 4.117  | 6.424   | 1.811  | 0.38 |
| 59 | 2.354  | 3.551   | 1.158  | 0.5  |
| 60 | 8.387  | 11.874  | 4.899  | 0.26 |
| 61 | 4.526  | 6.32    | 2.732  | 0.43 |
| 62 | 10.364 | 14.615  | 6.113  | 0.21 |
| 63 | 4.814  | 6.971   | 2.658  | 0.39 |
| 64 | 4.642  | 6.591   | 2.694  | 0.42 |
| 65 | 6.238  | 8.722   | 3.754  | 0.36 |
| 66 | 2.461  | 4.649   | 0.273  | 0.39 |
| 67 | 3.021  | 4.385   | 1.657  | 0.48 |
| 68 | 2.025  | 3.147   | 0.903  | 0.5  |
| 69 | 2.811  | 4.054   | 1.569  | 0.49 |
| 70 | 6.764  | 9.901   | 3.628  | 0.29 |
| 71 | 4.909  | 7.559   | 2.259  | 0.34 |
| 72 | 1.735  | 3.148   | 0.321  | 0.47 |
| 73 | 3.446  | 5.473   | 1.418  | 0.41 |
| 74 | 1.818  | 3.038   | 0.599  | 0.49 |
| 75 | 1.819  | 3.257   | 0.38   | 0.47 |
| 76 | 2.28   | 3.227   | 1.334  | 0.52 |
| 77 | 4.415  | 5.811   | 3.019  | 0.48 |
| 78 | 0.641  | 1.815   | -0.533 | 0.5  |
| 79 | 4.515  | 7.343   | 1.687  | 0.32 |
| 80 | 2.475  | 3.7     | 1.25   | 0.49 |
| 81 | 2.315  | 3.502   | 1.128  | 0.5  |
| 82 | 1.612  | 2.651   | 0.573  | 0.51 |
| 83 | 0.986  | 2.042   | -0.07  | 0.51 |
| 84 | 9.195  | 13.824  | 4.566  | 0.19 |
| 85 | 5.917  | 8.143   | 3.691  | 0.38 |
| 86 | 8.577  | 11.67   | 5.484  | 0.3  |
| 87 | 3.142  | 4.734   | 1.551  | 0.46 |
| 88 | 3.04   | 4.409   | 1.671  | 0.48 |
| 89 | 1.373  | 2.834   | -0.088 | 0.47 |
| 90 | 4.943  | 6.464   | 3.422  | 0.46 |
| 91 | 89.887 | 140.508 | 39.267 | 0    |
| 92 | 11.113 | 21.963  | 0.264  | 0.05 |
| 93 | 9.079  | 12.339  | 5.819  | 0.28 |
| 94 | 10.589 | 14.354  | 6.823  | 0.24 |
| 95 | 3.097  | 4.674   | 1.519  | 0.46 |
| 96 | 79.196 | 123.799 | 34.593 | 0    |
| 97 | 15.085 | 29.739  | 0.431  | 0.03 |
| 98 | 1.605  | 2.643   | 0.568  | 0.51 |

|     |        |        |        |      |
|-----|--------|--------|--------|------|
| 99  | 2.797  | 3.976  | 1.618  | 0.5  |
| 100 | 0.575  | 1.498  | -0.349 | 0.52 |
| 101 | 1.026  | 1.887  | 0.165  | 0.53 |
| 102 | 3.813  | 5.623  | 2.003  | 0.43 |
| 103 | 3.017  | 4.874  | 1.16   | 0.43 |
| 104 | 2.415  | 3.626  | 1.205  | 0.5  |
| 105 | 7.452  | 10.584 | 4.321  | 0.29 |
| 106 | 1.728  | 2.69   | 0.765  | 0.52 |
| 107 | 7.175  | 9.806  | 4.543  | 0.34 |
| 108 | 12.204 | 16.514 | 7.893  | 0.2  |
| 109 | 2.467  | 3.691  | 1.244  | 0.49 |
| 110 | 16.473 | 22.238 | 10.709 | 0.14 |
| 111 | 3.832  | 6.32   | 1.344  | 0.36 |
| 112 | 0.212  | 1.195  | -0.772 | 0.52 |
| 113 | 3.907  | 5.518  | 2.296  | 0.45 |
| 114 | 1.671  | 2.856  | 0.485  | 0.5  |
| 115 | 1.632  | 2.808  | 0.455  | 0.5  |
| 116 | 5.084  | 7.812  | 2.356  | 0.33 |
| 117 | 14.478 | 19.561 | 9.395  | 0.16 |
| 118 | 1.942  | 3.418  | 0.466  | 0.47 |
| 119 | 1.367  | 2.489  | 0.245  | 0.5  |
| 120 | 0.572  | 1.304  | -0.161 | 0.54 |
| 121 | 1.966  | 3.075  | 0.856  | 0.51 |
| 122 | 9.471  | 13.376 | 5.566  | 0.23 |
| 123 | 2.16   | 3.312  | 1.008  | 0.5  |
| 124 | 3.498  | 4.515  | 2.48   | 0.51 |
| 125 | 0.457  | 1.454  | -0.54  | 0.52 |
| 126 | 0.878  | 1.743  | 0.014  | 0.53 |
| 127 | 2.755  | 4.05   | 1.461  | 0.49 |
| 128 | 5.972  | 8.549  | 3.395  | 0.35 |
| 129 | 5.085  | 7.18   | 2.991  | 0.4  |
| 130 | 12.352 | 17.01  | 7.694  | 0.18 |
| 131 | 2.024  | 3.146  | 0.902  | 0.5  |
| 132 | 4.254  | 7.492  | 1.016  | 0.28 |
| 133 | 2.891  | 4.22   | 1.561  | 0.48 |
| 134 | 1.553  | 2.581  | 0.525  | 0.51 |
| 135 | 2.637  | 3.902  | 1.372  | 0.49 |
| 136 | 3.765  | 5.924  | 1.606  | 0.39 |
| 137 | 3.18   | 4.586  | 1.774  | 0.48 |
| 138 | 0.627  | 1.639  | -0.384 | 0.51 |
| 139 | 1.147  | 2.022  | 0.271  | 0.53 |
| 140 | 3.305  | 5.541  | 1.069  | 0.38 |
| 141 | 4.591  | 6.854  | 2.328  | 0.38 |
| 142 | 0.163  | 1.145  | -0.819 | 0.52 |
| 143 | 6.622  | 10.046 | 3.197  | 0.27 |
| 144 | 2.676  | 4.404  | 0.948  | 0.44 |
| 145 | 1.647  | 2.827  | 0.467  | 0.5  |
| 146 | 1.874  | 2.964  | 0.784  | 0.51 |
| 147 | 0.858  | 2.065  | -0.349 | 0.5  |
| 148 | 3.1    | 4.678  | 1.522  | 0.46 |

|     |        |         |        |      |
|-----|--------|---------|--------|------|
| 149 | 2.065  | 3.58    | 0.549  | 0.46 |
| 150 | 2.743  | 3.91    | 1.576  | 0.5  |
| 151 | 2.282  | 3.228   | 1.335  | 0.52 |
| 152 | 3.257  | 4.395   | 2.119  | 0.5  |
| 153 | 1.663  | 3.055   | 0.27   | 0.48 |
| 154 | 10.098 | 15.917  | 4.28   | 0.13 |
| 155 | 1.337  | 2.787   | -0.113 | 0.47 |
| 156 | 8.13   | 11.075  | 5.185  | 0.31 |
| 157 | 2.777  | 4.158   | 1.396  | 0.48 |
| 158 | 2.232  | 3.399   | 1.064  | 0.5  |
| 159 | 3.036  | 4.403   | 1.668  | 0.48 |
| 160 | 3.265  | 4.896   | 1.635  | 0.45 |
| 161 | 3.061  | 5.184   | 0.938  | 0.4  |
| 162 | 1.208  | 2.484   | -0.068 | 0.49 |
| 163 | 4.074  | 5.733   | 2.415  | 0.45 |
| 164 | 25.776 | 34.734  | 16.819 | 0.07 |
| 165 | 24.099 | 32.479  | 15.719 | 0.07 |
| 166 | 10.373 | 14.066  | 6.68   | 0.25 |
| 167 | 21.276 | 28.685  | 13.866 | 0.09 |
| 168 | 10.156 | 16.007  | 4.306  | 0.13 |
| 169 | 3.707  | 5.482   | 1.932  | 0.43 |
| 170 | 3.856  | 5.68    | 2.031  | 0.43 |
| 171 | 1.872  | 3.104   | 0.639  | 0.49 |
| 172 | 1.315  | 2.615   | 0.014  | 0.49 |
| 173 | 1.533  | 2.688   | 0.378  | 0.5  |
| 174 | 0.914  | 1.846   | -0.018 | 0.52 |
| 175 | 0.986  | 2.118   | -0.147 | 0.5  |
| 176 | 5.859  | 9.384   | 2.335  | 0.26 |
| 177 | 2.249  | 3.578   | 0.92   | 0.48 |
| 178 | 3.95   | 8.085   | -0.186 | 0.22 |
| 179 | 2.177  | 3.487   | 0.867  | 0.49 |
| 180 | 10.092 | 13.69   | 6.493  | 0.25 |
| 181 | 7.296  | 9.967   | 4.625  | 0.34 |
| 182 | 3.81   | 5.62    | 2.001  | 0.43 |
| 183 | 4.284  | 6.005   | 2.563  | 0.44 |
| 184 | 12.69  | 17.848  | 7.531  | 0.16 |
| 185 | 0.588  | 1.755   | -0.58  | 0.5  |
| 186 | 1.767  | 3.356   | 0.178  | 0.46 |
| 187 | 4.863  | 6.366   | 3.361  | 0.47 |
| 188 | 91.714 | 143.363 | 40.066 | 0    |
| 189 | 21.312 | 41.953  | 0.671  | 0.01 |
| 190 | 2.061  | 3.191   | 0.931  | 0.5  |
| 191 | 3.36   | 4.672   | 2.048  | 0.49 |
| 192 | 1.473  | 2.516   | 0.43   | 0.51 |
| 193 | 1.102  | 1.972   | 0.232  | 0.53 |
| 194 | 1.458  | 2.469   | 0.446  | 0.51 |
| 195 | 5.714  | 8.196   | 3.232  | 0.36 |
| 196 | -1.047 | 0.195   | -2.289 | 0.49 |
| 197 | 1.356  | 2.35    | 0.362  | 0.52 |
| 198 | 1.647  | 2.596   | 0.698  | 0.52 |

|     |        |        |        |      |
|-----|--------|--------|--------|------|
| 199 | 5.457  | 7.537  | 3.376  | 0.4  |
| 200 | 15.915 | 21.488 | 10.342 | 0.14 |
| 201 | 8.354  | 11.373 | 5.335  | 0.3  |
| 202 | 10.849 | 14.702 | 6.996  | 0.23 |
| 203 | 6.399  | 10.208 | 2.589  | 0.24 |
| 204 | 0.108  | 1.089  | -0.873 | 0.52 |
| 205 | 1.972  | 3.083  | 0.862  | 0.51 |
| 206 | 2.202  | 3.518  | 0.886  | 0.48 |
| 207 | 2.381  | 3.746  | 1.016  | 0.48 |
| 208 | 3.725  | 5.866  | 1.583  | 0.39 |
| 209 | 2.786  | 4.088  | 1.483  | 0.49 |
| 210 | 1.923  | 3.167  | 0.678  | 0.49 |
| 211 | 0.565  | 1.297  | -0.167 | 0.54 |
| 212 | 3.058  | 4.432  | 1.685  | 0.48 |
| 213 | 8.845  | 12.508 | 5.181  | 0.25 |
| 214 | 2.877  | 4.203  | 1.551  | 0.48 |
| 215 | 2.752  | 3.64   | 1.865  | 0.53 |
| 216 | 18.449 | 25.876 | 11.021 | 0.09 |
| 217 | 1.538  | 2.491  | 0.586  | 0.52 |
| 218 | 2.93   | 4.456  | 1.405  | 0.46 |
| 219 | 2.954  | 4.384  | 1.524  | 0.47 |
| 220 | 3.13   | 4.611  | 1.65   | 0.47 |
| 221 | 0.742  | 2.219  | -0.735 | 0.47 |
| 222 | 2.336  | 3.528  | 1.144  | 0.5  |
| 223 | 2.457  | 3.678  | 1.237  | 0.49 |
| 224 | 3.595  | 5.684  | 1.507  | 0.4  |
| 225 | 2.301  | 3.485  | 1.117  | 0.5  |
| 226 | 2.68   | 4.13   | 1.229  | 0.47 |
| 227 | 1.755  | 2.771  | 0.739  | 0.51 |
| 228 | 6.727  | 9.848  | 3.607  | 0.29 |
| 229 | 5.595  | 8.551  | 2.639  | 0.31 |
| 230 | 1.239  | 2.522  | -0.044 | 0.49 |
| 231 | 1.838  | 3.063  | 0.614  | 0.49 |
| 232 | 5.727  | 11.484 | -0.03  | 0.14 |
| 233 | 2.783  | 4.085  | 1.482  | 0.49 |
| 234 | 1.485  | 2.829  | 0.141  | 0.48 |
| 235 | 4.249  | 6.208  | 2.291  | 0.41 |
| 236 | 2.568  | 4.257  | 0.879  | 0.44 |
| 237 | 3.625  | 5.003  | 2.247  | 0.48 |
| 238 | 1.589  | 2.425  | 0.754  | 0.53 |
| 239 | 2.583  | 3.585  | 1.581  | 0.52 |
| 240 | 0.164  | 1.298  | -0.971 | 0.5  |
| 241 | 6.794  | 10.814 | 2.773  | 0.22 |
| 242 | 4.707  | 7.633  | 1.781  | 0.31 |
| 243 | 1.408  | 2.879  | -0.064 | 0.47 |
| 244 | 5.202  | 7.335  | 3.069  | 0.39 |
| 245 | 2.036  | 3.161  | 0.912  | 0.5  |
| 246 | 3.477  | 4.965  | 1.989  | 0.47 |
| 247 | 2.213  | 3.378  | 1.047  | 0.5  |
| 248 | 6.162  | 8.809  | 3.515  | 0.34 |

|        |       |       |       |      |
|--------|-------|-------|-------|------|
| 249    | 2.934 | 4.759 | 1.109 | 0.43 |
| 250    | 3.242 | 4.665 | 1.819 | 0.47 |
| pooled | 3.196 | 3.44  | 2.952 | 100  |
